# Supplementary material for: Systems approach for the selection of micro-RNAs as therapeutic biomarkers of anti-EGFR monoclonal antibody treatment in colorectal cancer
Source: PubMed Central journal article supplement — Sci Rep. 2015 Jan 27;5:8013. doi: 10.1038/srep08013 (PMC5389028; doi:10.1038/srep08013), 2015-01-27

Title: Systems approach for the identification of micro-RNAs as therapeutic biomarkers in colorectal cancer

Author: Avisek Deyati<sup>2, 3</sup>, Shweta Bagewadi<sup>2, 3</sup>, Philipp Senger<sup>2, 3</sup>, Martin Hofmann-Apitius<sup>2,3</sup>, Natalia Novac<sup>1</sup>

<sup>1</sup>Merck Serono, Frankfurter Strasse 250, 64293 Darmstadt, Germany

<sup>2</sup>Fraunhofer Institute SCAI, Schloss Birlinghoven, 53754 Sankt Augustin, Germany

<sup>3</sup>Bonn-Aachen International Center for Information Technology (B-IT), Department of Applied Life Science Informatics, 53113 Bonn, Germany

Supplementary Figure S1: Top miRNA for 4 pathway maps based on number of targets

Supplementary Figure S2: miRNA and its score based on SmartMir algorithm

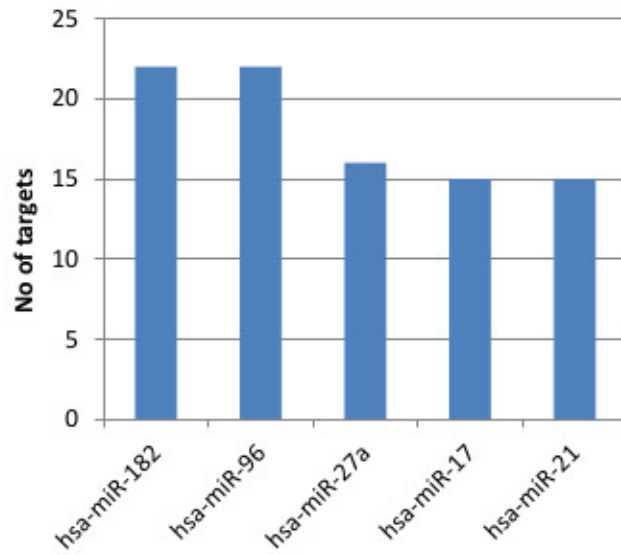

**miRNA in Angiogenesis**

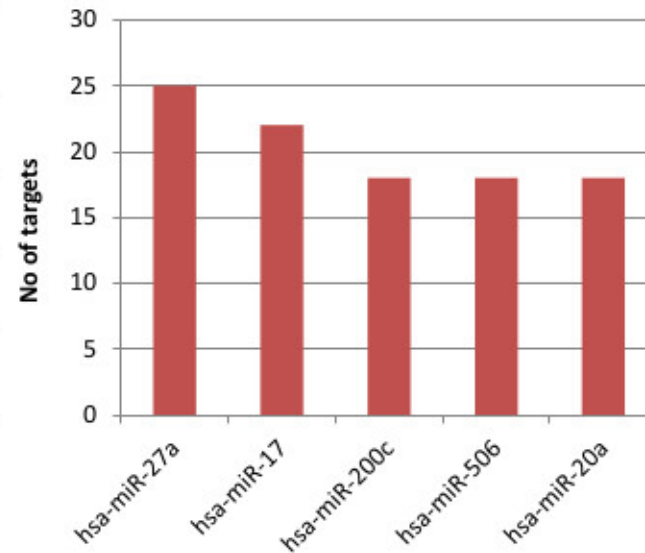

**miRNA in Metastasis**

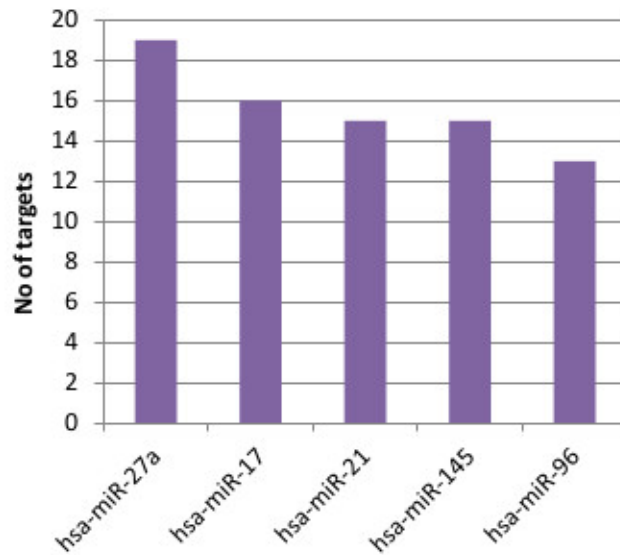

**miRNA in Apoptosis**

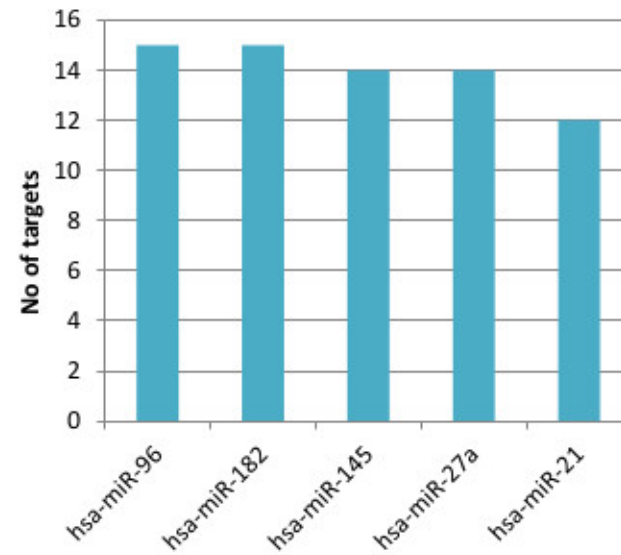

**miRNA in proliferation**

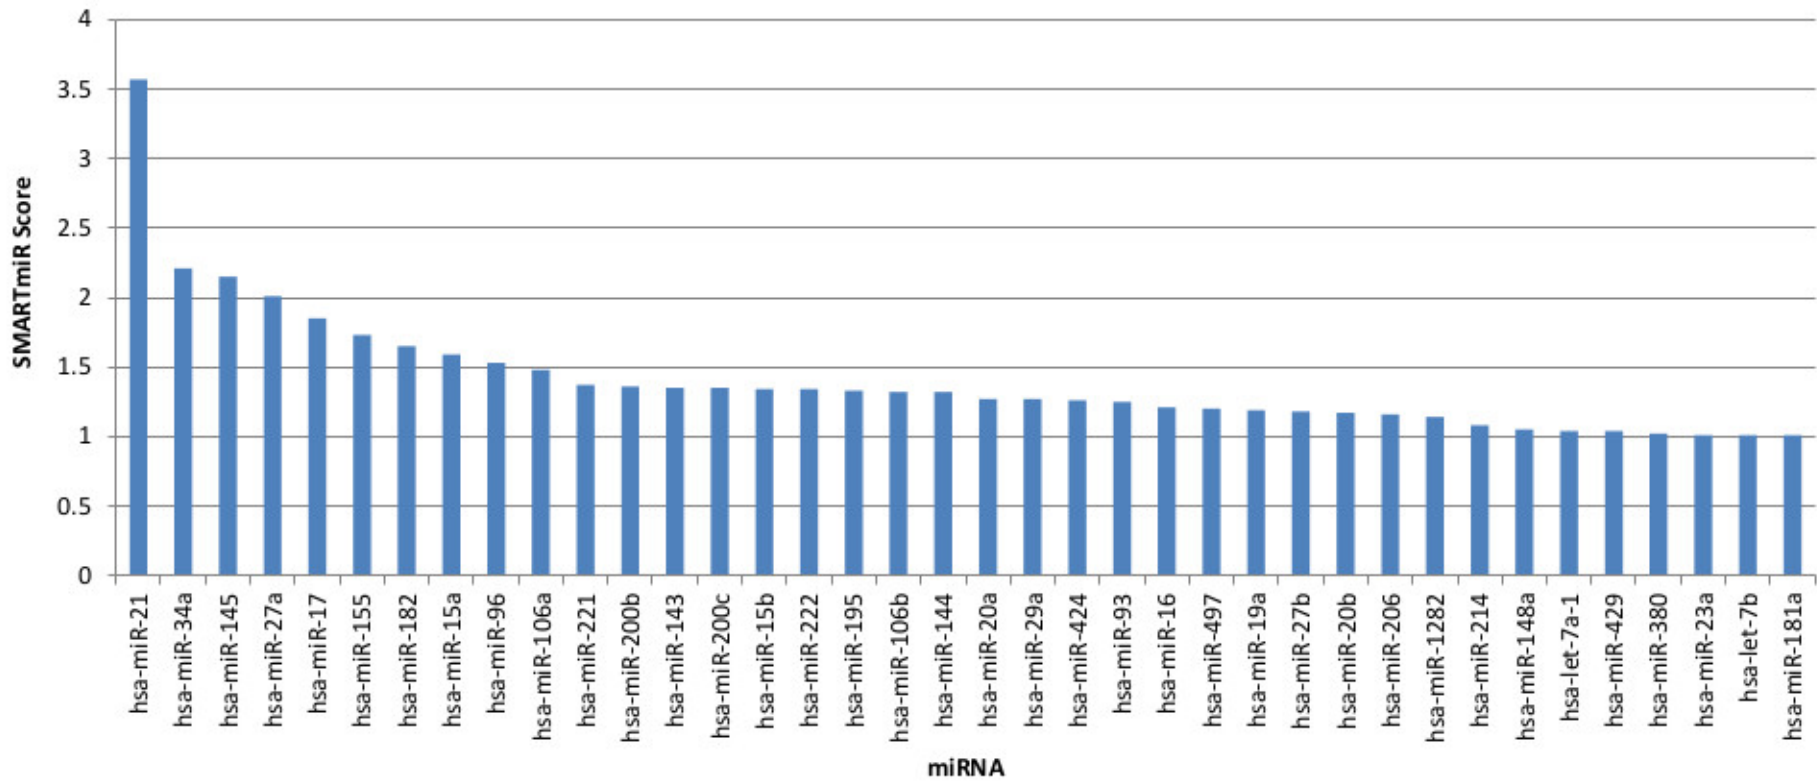

Supplement: srep08013-s1.pdf [file srep08013-s1.pdf]
